# Supplementary material for: Peak Inspiratory Flow Rate: An Emerging Biomarker in Chronic Obstructive Pulmonary Disease
Source: PubMed Central journal article supplement — Am J Respir Crit Care Med. 2019 Jun 15;199(12):1577–9. doi: 10.1164/rccm.201901-0005LE (PMC6580681; doi:10.1164/rccm.201901-0005le), 2019-06-15
Supplement: rccm.201901-0005LE_disclosures.pdf [file rccm.201901-0005LE_disclosures.pdf]

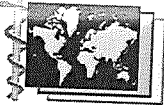

# ICMJE Form for Disclosure of Potential Conflicts of Interest

## Section 1. Identifying Information

1. Given Name (First Name) DONALD      2. Surname (Last Name) MANUER      3. Date 2/19/19

4. Are you the corresponding author?     Yes     No

5. Manuscript Title  
PEAK INSPIRATORY FLOW RATE: AN EMERGING BIOMARKER IN COPD

6. Manuscript Identifying Number (if you know it)  
BLUE-201901-0005 LE.R1

## Section 2. The Work Under Consideration for Publication

Did you or your institution **at any time** receive payment or services from a third party (government, commercial, private foundation, etc.) for any aspect of the submitted work (including but not limited to grants, data monitoring board, study design, manuscript preparation, statistical analysis, etc.)

Are there any relevant conflicts of interest?     Yes     No

## Section 3. Relevant financial activities outside the submitted work.

Place a check in the appropriate boxes in the table to indicate whether you have financial relationships (regardless of amount of compensation) with entities as described in the instructions. Use one line for each entity; add as many lines as you need by clicking the "Add +" box. You should report relationships that were **present during the 36 months prior to publication.**

Are there any relevant conflicts of interest?     Yes     No    ADVISORY BOARDS FOR ASTRA ZENECA, BOEHRINGER-INGELHEIM, NOVARTIS, GLAXOSMITH KLINE, SUNOVION & THERAVANCE. SPEAKERS' BUREAU: BOEHRINGER-INGELHEIM, GRIFOLS, AND SUNOVION.

## Section 4. Intellectual Property -- Patents & Copyrights

Do you have any patents, whether planned, pending or issued, broadly relevant to the work?     Yes     No

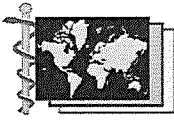

## ICMJE Form for Disclosure of Potential Conflicts of Interest

### Section 5. Relationships not covered above

Are there other relationships or activities that readers could perceive to have influenced, or that give the appearance of potentially influencing, what you wrote in the submitted work?

- ROYALTIES - HILLCREST MEDIA FOR COPD: ANSWERS TO YOUR QUESTIONS,  
2015, CRC PRESS FOR DYSPNEA: MECHANISMS, MEASUREMENT  
AND MANAGEMENT, 3RD EDITION, 2015
- Yes, the following relationships/conditions/circumstances are present (explain below):
- No other relationships/conditions/circumstances that present a potential conflict of interest

At the time of manuscript acceptance, journals will ask authors to confirm and, if necessary, update their disclosure statements. On occasion, journals may ask authors to disclose further information about reported relationships.

### Section 6. Disclosure Statement

Based on the above disclosures, this form will automatically generate a disclosure statement, which will appear in the box below.

SEE ABOVE INFORMATION

### Evaluation and Feedback

Please visit <http://www.icmje.org/cgi-bin/feedback> to provide feedback on your experience with completing this form.

\* COULD NOT OPEN FORM ON TWO DIFFERENT COMPUTERS;  
HAD TO PRINT AND THEN ANSWER SECTIONS.

Donald A Miller and 2/19/19
